# Supplementary material
Source: PubMed Central journal article supplement (PMC4983715)

# Measuring specific receptor binding of a PET radioligand in human brain without pharmacological blockade: the genomic plot

Mattia Veronese, Paolo Zanotti-Fregonara, Gaia Rizzo,  
Alessandra Bertoldo, Robert B. Innis and Federico E. Turkheimer

## Supplementary Material

**Supplementary Table 1 – [<sup>11</sup>C]WAY100635 data**

| ROIs            | $V_T$<br>(ml/cm <sup>3</sup> ) | mRNA<br>(unitless) |
|-----------------|--------------------------------|--------------------|
| Frontal lobe    | 1.50 ± 0.85                    | 53.9 ± 8.7         |
| Parietal lobe   | 1.42 ± 0.77                    | 43.4 ± 12.4        |
| Temporal lobe   | 1.88 ± 0.85                    | 78.7 ± 7.2         |
| Occipital lobe  | 1.21 ± 0.58                    | 36.5 ± 53.3        |
| Cingulate gyrus | 1.88 ± 0.77                    | 57.6 ± 3.0         |
| Hippocampus     | 1.81 ± 1.05                    | n.a. ± n.a.        |
| Insula          | 1.95 ± 1.12                    | 83.6 ± 9.0         |
| Striatum        | 0.59 ± 0.39                    | 5.6 ± 0.6          |
| Globus pallidus | 0.48 ± 0.46                    | 10.5 ± 3.3         |
| Basal forebrain | 0.63 ± 0.27                    | 28.8 ± 35.2        |
| Clastrum        | n.a. ± n.a.                    | n.a. ± n.a.        |
| Amygdala        | 1.45 ± 0.77                    | 45.2 ± 66.4        |
| Thalamus        | 0.58 ± 0.35                    | 16.0 ± 3.4         |
| Cerebellum      | 0.53 ± 0.58                    | 3.8 ± 0.2          |
| Brainstem       | 0.52 ± 0.39                    | n.a. ± n.a.        |

Distribution volume estimates ( $V_T$ ) refer to a population of 15 healthy subjects (Bose et al., 2011). Genomic data (mRNA) are derived from the Allen human brain atlas (query: HTR1A). For each region the average values and the standard deviations across subjects are reported.

### **References**

Bose, S.K., Mehta, M.A., Selvaraj, S., Howes, O.D., Hinz, R., Rabiner, E.A., Grasby, P.M., Turkheimer, F.E., Murthy, V., 2011. Presynaptic 5-HT<sub>1A</sub> is related to 5-HTT receptor density in the human brain. *Neuropsychopharmacology* 36, 2258-2265.

Supplementary Table 2 – [<sup>11</sup>C]Ro15-4513 data

| ROIs            | $V_T$<br>(ml/cm <sup>3</sup> ) | mRNA<br>(unitless) |
|-----------------|--------------------------------|--------------------|
| Frontal lobe    | 4.07 ± 0.44                    | 285 ± 71           |
| Parietal lobe   | 3.70 ± 0.51                    | 208 ± 57           |
| Temporal lobe   | 4.96 ± 0.53                    | 317 ± 81           |
| Occipital lobe  | 3.90 ± 0.48                    | 165 ± 51           |
| Cingulate gyrus | 5.89 ± 0.52                    | 349 ± 104          |
| Hippocampus     | 7.82 ± 0.85                    | 852 ± 76           |
| Insula          | 5.11 ± 0.54                    | 436 ± 182          |
| Striatum        | 4.18 ± 0.51                    | 293 ± 95           |
| Globus pallidus | n.a. ± n.a.                    | 27 ± 49            |
| Basal forebrain | n.a. ± n.a.                    | 204 ± 9            |
| Clastrum        | n.a. ± n.a.                    | 818 ± 84           |
| Amygdala        | 7.61 ± 0.87                    | n.a. ± n.a.        |
| Thalamus        | 2.73 ± 0.2                     | 148 ± 36           |
| Cerebellum      | n.a. ± n.a.                    | 7 ± 30             |
| Brainstem       | n.a. ± n.a.                    | n.a. ± n.a.        |

Distribution volume estimates ( $V_T$ ) refer to a population of 4 healthy subjects (Stokes et al., 2014). Genomic data (mRNA) are derived from the Allen human brain atlas (query: GABRA5). For each region the average values and the standard deviations across subjects are reported.

### References

Stokes, P.R., Myers, J.F., Kalk, N.J., Watson, B.J., Erritzoe, D., Wilson, S.J., Cunningham, V.J., Barros, D.R., Hammers, A., Turkheimer, F.E., 2014. Acute increases in synaptic GABA detectable in the living human brain: A [<sup>11</sup>C] Ro15-4513 PET study. *Neuroimage* 99, 158-165.

Supplementary Table 3 – [<sup>11</sup>C]LY2795050 data

| ROIs            | $V_T$<br>(ml/cm <sup>3</sup> ) |        | mRNA<br>(unitless) |        |
|-----------------|--------------------------------|--------|--------------------|--------|
| Frontal lobe    | 2.66                           | ± 0.29 | 16.8               | ± 3.1  |
| Parietal lobe   | n.a.                           | ± n.a. | 13.7               | ± 2.7  |
| Temporal lobe   | 2.74                           | ± 0.30 | 16.9               | ± 1.9  |
| Occipital lobe  | 2.58                           | ± 0.26 | 11.5               | ± 2.5  |
| Cingulate gyrus | 2.74                           | ± 0.38 | 18.8               | ± 3.1  |
| Hippocampus     | 2.31                           | ± 0.28 | 16.2               | ± 5.5  |
| Insula          | 3.41                           | ± 0.34 | 24.4               | ± 5.2  |
| Striatum        | 2.60                           | ± 0.36 | 22.9               | ± 3.9  |
| Globus pallidus | 3.11                           | ± 0.37 | 6.1                | ± 2.0  |
| Basal forebrain | n.a.                           | ± n.a. | 20.6               | ± 8.0  |
| Clastrum        | n.a.                           | ± n.a. | 76.6               | ± 19.0 |
| Amygdala        | 3.95                           | ± 0.51 | 35.8               | ± 15.3 |
| Thalamus        | 2.14                           | ± 0.21 | 27.8               | ± 10.2 |
| Cerebellum      | 1.96                           | ± 0.18 | 8.8                | ± 4.0  |
| Brainstem       | n.a.                           | ± n.a. | 17.8               | ± 5.0  |

Distribution volume estimates ( $V_T$ ) refer to a population of 16 healthy subjects (Naganawa et al., 2014). Genomic data (mRNA) are derived from the Allen human brain atlas (query: OPRK1). For each region the average values and the standard deviations across subjects are reported.

## References

Naganawa, M., Zheng, M.-Q., Nabulsi, N., Tomasi, G., Henry, S., Lin, S.-F., Ropchan, J., Labaree, D., Tauscher, J., Neumeister, A., 2014. Kinetic modeling of <sup>11</sup>C-LY2795050, a novel antagonist radiotracer for PET imaging of the kappa opioid receptor in humans. *Journal of Cerebral Blood Flow & Metabolism* 34, 1818-1825.

**Supplementary Table 4 – [<sup>11</sup>C]FIMX data**

| ROIs            | $V_T$<br>(ml/cm <sup>3</sup> ) |   |      | mRNA<br>(unitless) |   |      |
|-----------------|--------------------------------|---|------|--------------------|---|------|
| Frontal lobe    | 2.4                            | ± | 0.31 | 22.3               | ± | 3.1  |
| Parietal lobe   | 2.3                            | ± | 0.28 | 21.4               | ± | 3.3  |
| Temporal lobe   | 3.1                            | ± | 0.37 | 28.3               | ± | 3.2  |
| Occipital lobe  | 2.7                            | ± | 0.46 | 19.3               | ± | 3.4  |
| Cingulate gyrus | 2.8                            | ± | 0.41 | 23.5               | ± | 3.5  |
| Hippocampus     | 2.9                            | ± | 0.39 | 32.6               | ± | 3.7  |
| Insula          | 3.0                            | ± | 0.41 | 29.1               | ± | 4.8  |
| Striatum        | 1.8                            | ± | 0.21 | 17.4               | ± | 3.4  |
| Globus pallidus | n.a.                           | ± | n.a. | 22.0               | ± | 5.3  |
| Basal forebrain | n.a.                           | ± | n.a. | 21.5               | ± | 3.5  |
| Clastrum        | n.a.                           | ± | n.a. | 17.9               | ± | 9.1  |
| Amygdala        | 2.7                            | ± | 0.37 | 20.4               | ± | 4.7  |
| Thalamus        | 3.3                            | ± | 0.50 | 34.3               | ± | 5.2  |
| Cerebellum      | 13.4                           | ± | 1.90 | 144.1              | ± | 24.0 |
| Brainstem       | n.a.                           | ± | n.a. | 14.2               | ± | 2.4  |

Distribution volume estimates ( $V_T$ ) refer to a population of 12 healthy subjects (Zanotti-Fregonara et al., 2015). Genomic data (mRNA) are derived from the Allen human brain atlas (query: GMR1). For each region the average values and the standard deviations across subjects are reported.

## References

Zanotti-Fregonara, P., Rong, X., Zoghbi, S.S., Liow, J.S., Fujita, M., Veronese, M., Gladding, R.L., Rallis-Frutos, D., Hong, J., Pike, V.W., Innis, R.B., 2015. The positron emission tomographic radioligand 18F-FIMX images and quantifies metabotropic glutamate receptor 1 in proportion to the regional density of its gene transcript in human brain. *Journal of Nuclear Medicine* (in press).

Supplementary Table 5 – [<sup>11</sup>C]NOP-1A data

| ROIs            | $V_T$<br>(ml/cm <sup>3</sup> ) |        | mRNA<br>(unitless) |        |
|-----------------|--------------------------------|--------|--------------------|--------|
| Frontal lobe    | 9.0                            | ± 0.83 | 32.4               | ± 3.3  |
| Parietal lobe   | 9.1                            | ± 0.87 | 35.0               | ± 2.2  |
| Temporal lobe   | 9.6                            | ± 0.85 | 34.0               | ± 3.7  |
| Occipital lobe  | 9.3                            | ± 0.89 | 40.4               | ± 3.7  |
| Cingulate gyrus | 8.9                            | ± 0.88 | 32.5               | ± 4.1  |
| Hippocampus     | n.a.                           | ± n.a. | 47.9               | ± 11.4 |
| Insula          | n.a.                           | ± n.a. | 30.1               | ± 5.8  |
| Striatum        | 8.7                            | ± 0.94 | 40.7               | ± 6.6  |
| Globus pallidus | n.a.                           | ± n.a. | 21.4               | ± 3.8  |
| Basal forebrain | n.a.                           | ± n.a. | 41.3               | ± 5.6  |
| Clastrum        | n.a.                           | ± n.a. | 53.9               | ± 14.4 |
| Amygdala        | n.a.                           | ± n.a. | 54.6               | ± 9.1  |
| Thalamus        | 5.5                            | ± 0.57 | 55.5               | ± 10.9 |
| Cerebellum      | 5.5                            | ± 0.57 | 15.1               | ± 3.9  |
| Brainstem       | 6.7                            | ± 0.67 | 46.2               | ± 4.6  |

Distribution volume estimates ( $V_T$ ) refer to a population of 11 healthy subjects (Lohith et al., 2014). Genomic data (mRNA) are derived from the Allen human brain atlas (query: OPRL1). For each region the average values and the standard deviations across subjects are reported.

### References

Lohith, T.G., Zoghbi, S.S., Morse, C.L., Araneta, M.D.F., Barth, V.N., Goebel, N.A., Tauscher, J.T., Pike, V.W., Innis, R.B., Fujita, M., 2014. Retest imaging of [<sup>11</sup>C] NOP-1A binding to nociceptin/orphanin FQ peptide (NOP) receptors in the brain of healthy humans. *Neuroimage* 87, 89-95.

Supplementary Table 6 – [<sup>11</sup>C](R)rolipram data

| ROIs            | $V_T$<br>(ml/cm <sup>3</sup> ) | mRNA<br>(unitless) |
|-----------------|--------------------------------|--------------------|
| Frontal lobe    | 0.53 ± 0.13                    | 71.7 ± 75.6        |
| Parietal lobe   | 0.56 ± 0.14                    | 42.1 ± 7.7         |
| Temporal lobe   | 0.56 ± 0.13                    | 41.7 ± 5.0         |
| Occipital lobe  | 0.45 ± 0.13                    | 45.2 ± 9.5         |
| Cingulate gyrus | 0.57 ± 0.14                    | 38.5 ± 6.4         |
| Hippocampus     | 0.55 ± 0.15                    | n.a. ± n.a.        |
| Insula          | 0.63 ± 0.15                    | 37.1 ± 5.1         |
| Striatum        | 0.63 ± 0.16                    | 57.5 ± 10.2        |
| Globus pallidus | 0.57 ± 0.13                    | 94.1 ± 23.2        |
| Basal forebrain | 0.59 ± 0.17                    | 60.0 ± 16.5        |
| Clastrum        | n.a. ± n.a.                    | 54.5 ± 15.2        |
| Amygdala        | 0.56 ± 0.14                    | 48.7 ± 16.0        |
| Thalamus        | 0.57 ± 0.14                    | 54.3 ± 12.9        |
| Cerebellum      | 0.45 ± 0.11                    | 24.2 ± 7.8         |
| Brainstem       | 0.38 ± 0.08                    | n.a. ± n.a.        |

Distribution volume estimates ( $V_T$ ) refer to a population of 12 healthy subjects (Zanotti-Fregonara et al., 2011). Genomic data (mRNA) are derived from the Allen human brain atlas (query: PDE4). For each region the average values and the standard deviations across subjects are reported.

### References

Zanotti-Fregonara, P., Zoghbi, S.S., Liow, J.-S., Luong, E., Boellaard, R., Gladding, R.L., Pike, V.W., Innis, R.B., Fujita, M., 2011. Kinetic analysis in human brain of [<sup>11</sup>C](R)-rolipram, a positron emission tomographic radioligand to image phosphodiesterase 4: a retest study and use of an image-derived input function. *Neuroimage* 54, 1903-1909.

Supplementary Table 7 – [<sup>11</sup>C]Raclopride

| ROIs            | $BP_{ND}$<br>(unitless)                        | mRNA<br>(unitless) |
|-----------------|------------------------------------------------|--------------------|
| Frontal lobe    | 0.26 ± 0.03                                    | 4.7 ± 0.6          |
| Parietal lobe   | 0.23 ± 0.02                                    | 5.0 ± 0.5          |
| Temporal lobe   | 0.27 ± 0.02                                    | 5.5 ± 0.6          |
| Occipital lobe  | 0.23 ± 0.02                                    | 5.6 ± 1.0          |
| Cingulate gyrus | 0.26 ± 0.03                                    | 6.0 ± 2.4          |
| Hippocampus     | 0.21 ± 0.05                                    | 9.2 ± 4.6          |
| Insula          | 0.34 ± 0.06                                    | 5.3 ± 1.0          |
| Striatum        | 1.60 ± 0.30                                    | 41.3 ± 9.2         |
| Globus pallidus | n.a. ± n.a.                                    | n.a. ± n.a.        |
| Basal forebrain | 0.72 ± 0.13                                    | 12.4 ± 2.3         |
| Clastrum        | n.a. ± n.a.                                    | 11.3 ± 3.1         |
| Amygdala        | n.a. ± n.a.                                    | 9.5 ± 2.1          |
| Thalamus        | 0.37 ± 0.07                                    | 13.7 ± 2.6         |
| Cerebellum      | Reference region – discarded from the analysis |                    |
| Brainstem       | n.a. ± n.a.                                    | 15.3 ± 2.5.        |

Binding potential ( $BP_{ND}$ ) refer to a population of 10 healthy subjects (Pavese et al., 2006). Genomic data (mRNA) are derived from the Allen human brain atlas (query: DRD2). For each region the average values and the standard deviations across subjects are reported.

### References

Pavese, N., Gerhard, A., Tai, Y., Ho, A., Turkheimer, F., Barker, R., Brooks, D., Piccini, P., 2006. Microglial activation correlates with severity in Huntington disease A clinical and PET study. *Neurology* 66, 1638-1643.

### Supplementary Figure 1 – Single subject analysis with [<sup>11</sup>C]WAY100635 PET data

Panels A-C show some representative single-subject genomic plot applications. Both  $V_T$  (x-axis) and mRNA (y-axis) standard errors are reported. Red lines refer to genomic plot regressions. Black dashed lines refer to the data regression with x-intercepts forced to the population  $V_{ND}$  reference value. Panel D shows the distribution of  $V_{ND}$  estimates obtained with the single subject analysis. Population  $V_{ND}$  reference estimate (red line) and its standard deviation (grey area) are compared with single subject  $V_{ND}$  estimates (blue circles). Population average of  $V_{ND}$  individual estimates (dashed black line) is also reported.

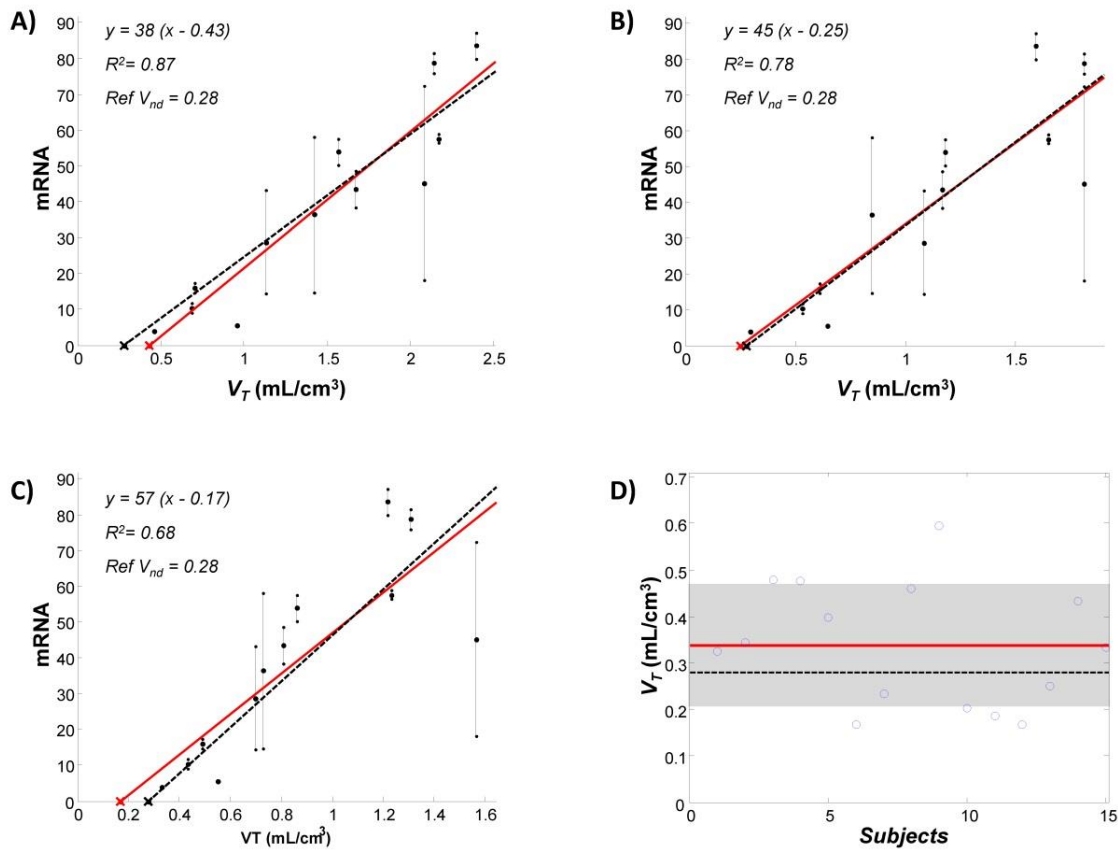



**Supplementary Figure 2 – Single subject analysis with [<sup>11</sup>C]Raclopride PET data**

Panels A-C show some representative single-subject genomic plot applications. Both  $BP_{ND}$  (x-axis) and mRNA (y-axis) standard errors are reported. Red lines refer to genomic plot regressions. Black dashed lines refer to the data regression with x-intercepts forced to the origin. Panel D shows the  $V_{ND}$  absolute biases, defined as the relative difference between the individual genomic plot estimates and the single-subject reference values (as defined by the reference region).

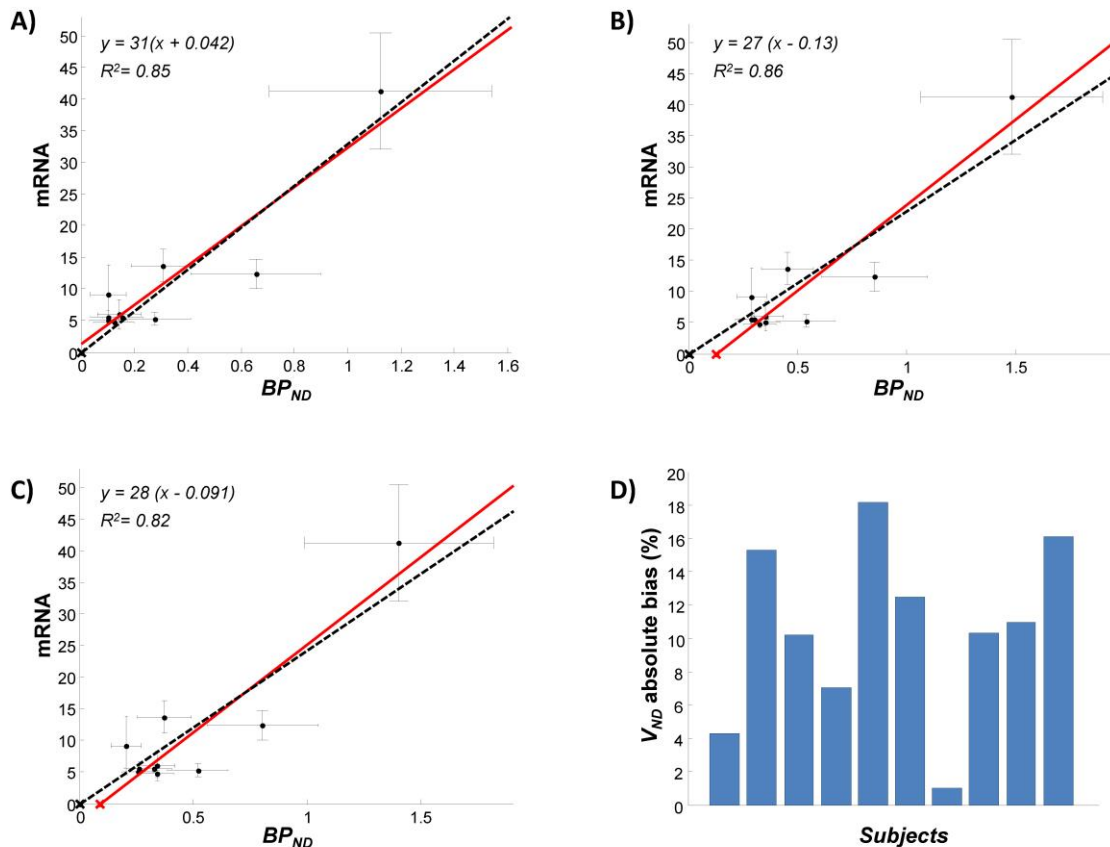

Supplement: NIHMS808365-supplement-Supplemental_Materials.pdf [file NIHMS808365-supplement-Supplemental_Materials.pdf]
